# Supplementary material for: Immune-Related Functions of the Hivep Gene Family in East African Cichlid Fishes
Source: PubMed Central journal article supplement (PMC3852383; doi:10.1534/g3.113.008839), 2013-10-18
Supplement: supp_g3.113.008839_008839SI.pdf [file supp_g3.113.008839_008839SI.pdf]

## Immune-related functions of the *Hivep* gene family in East African cichlid fishes

EVELINE T. DIEPEVEEN\*<sup>1</sup>, OLIVIA ROTH§ and WALTER SALZBURGER\*

\**Zoological Institute, University of Basel, 4051 Basel, Switzerland*

§*Evolutionary Ecology of Marine Fishes, Helmholtz Centre of Ocean Research Kiel (GEOMAR), D-24105 Kiel, Germany*

<sup>1</sup> Present address: Department of Environmental Science, Policy and Management, University of California, Berkeley, CA 94720

All generated cichlid *Hivep* sequences have been deposited into GenBank [GenBank: KF049218 - KF049416]

DOI: [10.1534/g3.113.008839](https://doi.org/10.1534/g3.113.008839)

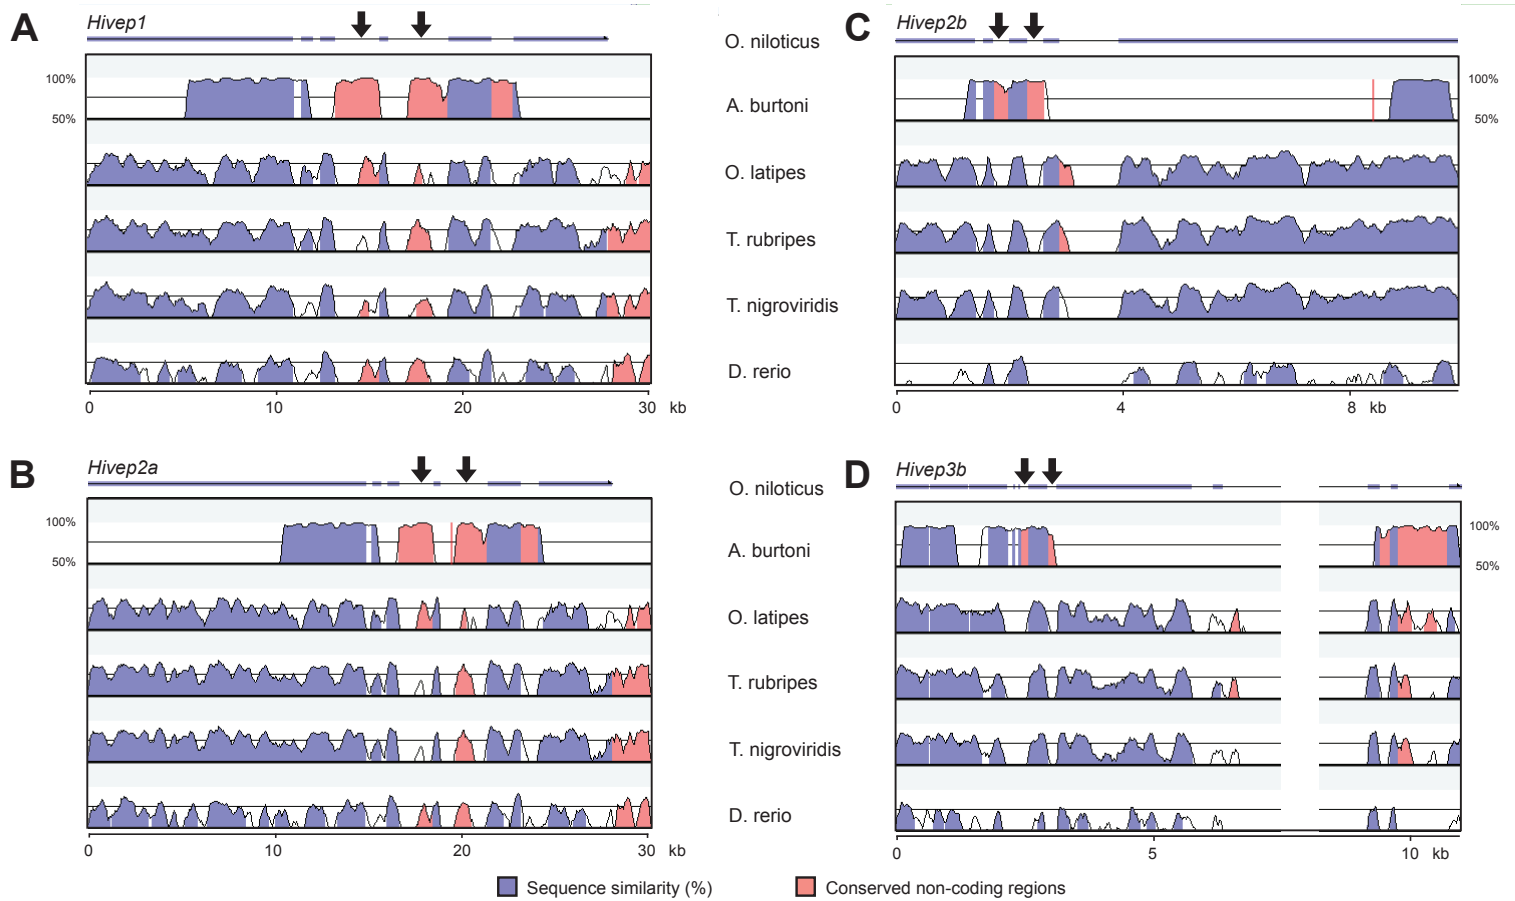

**Figure S1** Vistaplots for four *Hivex* paralogs. Sequence similarity with a minimum of 50% identity between *A. burtoni* (top panel), *O. latipes* (second panel), *T. rubripes* (mid panel), *T. nigroviridis* (fourth panel), *D. rerio* (bottom panel) and *O. niloticus* (exon-intron structure on top of figure) are displayed in purple. Pink regions indicate conserved non-coding regions (CNEs). Arrows indicate the two identified CNEs in all four paralogs. Three CNEs were observed in *Hivex1* (A) and *Hivex2a* (B) in *A. burtoni*, of which two were commonly observed among teleosts. (C) Two cichlid-specific CNEs were observed in *Hivex2b*. (D) In *Hivex3b* four CNEs were observed.

## Color key for radical amino acid properties per *Hivep* paralog in Figure 2

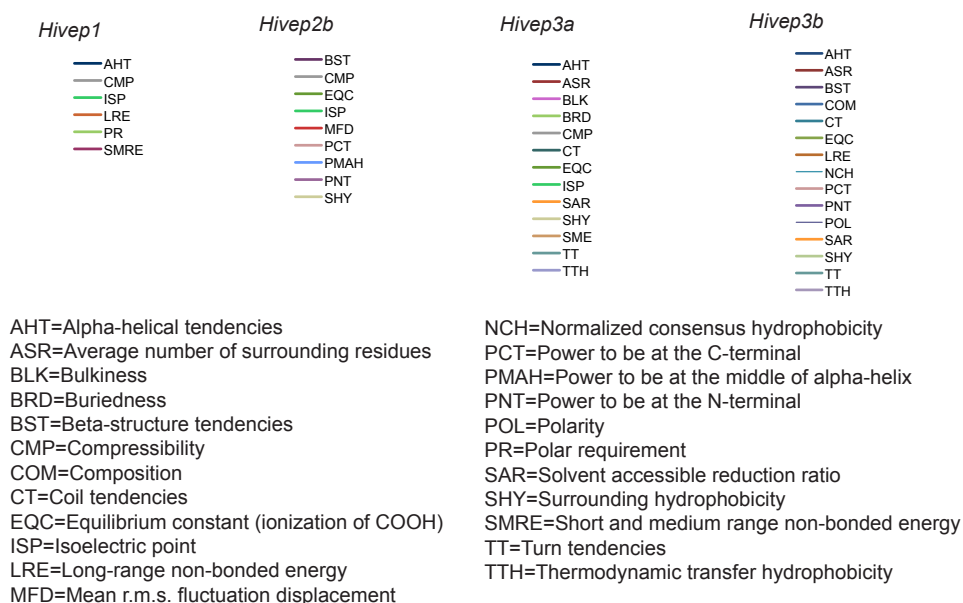

**Figure S2** Overview of the radical amino acid properties identified by the TreeSAAP analyses for four *Hivep* paralogs. Colors correspond to the sliding window plots in Fig. 2 and amino acid properties abbreviations are displayed for each paralog individually.

**Table S1 Species names, Tribes and GenBank accession numbers of the five sequenced *Hivep* paralogs**

| Species                             | Tribe              | <i>Hivep1</i> | <i>Hivep2a</i> | <i>Hivep2b</i> | <i>Hivep3a</i> | <i>Hivep3b</i> |
|-------------------------------------|--------------------|---------------|----------------|----------------|----------------|----------------|
| <i>Bathybates graueri</i>           | Bathybatini        | KF049218      | KF049276       | KF049316       | KF049357       | KF049398       |
| <i>Benthochromis tricoti</i>        | Benthochromis      | KF049245      | KF049264       | KF049303       | KF049373       | KF049385       |
| <i>Boulengerochromis microlepis</i> | Boulengerochromini | KF049229      | KF049258       | KF049297       | KF049337       | KF049377       |
| <i>Ctenochromis benthicola</i>      | Cyphotilapiini     | KF049241      | KF049267       | KF049306       | KF049347       | KF049388       |
| <i>Cyphotilapia frontosa</i>        | Cyphotilapiini     | KF049237      | KF049293       | KF049333       | KF049371       | KF049415       |
| <i>Cyprichromis leptosoma</i>       | Cyprichromini      | KF049227      | KF049265       | KF049304       | KF049345       | KF049386       |
| <i>Aulocranus dewindtii</i>         | Ectodini           | KF049244      | KF049263       | KF049335       | KF049344       | KF049384       |
| <i>Callochromis macrops</i>         | Ectodini           | KF049228      | KF049268       | KF049307       | KF049348       | KF049389       |
| <i>Cyathopharynx furcifer</i>       | Ectodini           | KF049238      | KF049296       | KF049336       | KF049341       | KF049381       |
| <i>Grammatotria lemairii</i>        | Ectodini           | KF049249      | KF049272       | KF049311       | KF049352       | KF049393       |
| <i>Xenotilapia flavipinnis</i>      | Ectodini           | KF049256      | KF049288       | KF049328       | KF049366       | KF049410       |
| <i>Xenotilapia spiloptera</i>       | Ectodini           | KF049254      | KF049286       | KF049326       | KF049364       | KF049408       |
| <i>Eretmodus cyanostictus</i>       | Eretmodini         | KF049239      | KF049295       | KF049298       | KF049338       | KF049378       |
| <i>Astatotilapia burtoni</i>        | Haplochromini      | KF049240      | KF049260       | KF049300       | KF049340       | KF049380       |
| <i>Ctenochromis horei</i>           | Haplochromini      | KF049246      | KF049290       | KF049330       | KF049368       | KF049412       |
| <i>Altolamprologus fasciatus</i>    | Lamprologini       | KF049243      | KF049289       | KF049329       | KF049367       | KF049411       |
| <i>Julidochromis ornatus</i>        | Lamprologini       | KF049248      | KF049271       | KF049310       | KF049351       | KF049392       |
| <i>Lamprologus lemairii</i>         | Lamprologini       | KF049255      | KF049273       | KF049312       | KF049353       | KF049394       |
| <i>Lepidolamprologus elongatus</i>  | Lamprologini       | KF049242      | KF049294       | KF049334       | KF049372       | KF049416       |
| <i>Neolamprologus furcifer</i>      | Lamprologini       | KF049230      | KF049275       | KF049315       | KF049356       | KF049397       |
| <i>Neolamprologus pulcher</i>       | Lamprologini       | KF049231      | KF049274       | KF049314       | KF049355       | KF049396       |
| <i>Neolamprologus sexfasciatus</i>  | Lamprologini       | KF049250      | -*             | KF049313       | KF049354       | KF049395       |
| <i>Neolamprologus tetracanthus</i>  | Lamprologini       | KF049251      | KF049278       | KF049318       | KF049374       | KF049400       |
| <i>Telmatochromis dhonti</i>        | Lamprologini       | KF049257      | KF049284       | KF049324       | KF049375       | KF049406       |
| <i>Variabilichromis moorii</i>      | Lamprologini       | KF049219      | KF049292       | KF049332       | KF049370       | KF049414       |
| <i>Gnathochromis permaxillaris</i>  | Limnochromini      | KF049232      | KF049269       | KF049308       | KF049349       | KF049390       |
| <i>Limnochromis staneri</i>         | Limnochromini      | KF049220      | KF049262       | KF049302       | KF049343       | KF049383       |
| <i>Reganochromis calliurus</i>      | Limnochromini      | KF049252      | KF049282       | KF049322       | KF049376       | KF049404       |
| <i>Haplotaxodon microlepis</i>      | Perissodini        | KF049247      | KF049270       | KF049309       | KF049350       | KF049391       |
| <i>Perissodus microlepis</i>        | Perissodini        | KF049233      | KF049279       | KF049319       | KF049359       | KF049401       |
| <i>Plecodus straeleni</i>           | Perissodini        | KF049221      | KF049261       | KF049301       | KF049342       | KF049382       |
| <i>Oreochromis tanganyicae</i>      | Tilapiini          | KF049234      | KF049277       | KF049317       | KF049358       | KF049399       |
| <i>Trematocara nigrifrons</i>       | Trematocarini      | KF049235      | KF049280       | KF049320       | KF049360       | KF049402       |
| <i>Lobochilotes labiatus</i>        | Tropheini          | KF049222      | KF049287       | KF049327       | KF049365       | KF049409       |
| <i>Petrochromis famula</i>          | Tropheini          | KF049236      | KF049281       | KF049321       | KF049361       | KF049403       |
| <i>Petrochromis polyodon</i>        | Tropheini          | KF049253      | KF049283       | KF049323       | KF049362       | KF049405       |
| <i>Pseudosimochromis curvifrons</i> | Tropheini          | KF049223      | KF049259       | KF049299       | KF049339       | KF049379       |
| <i>Simochromis diagramma</i>        | Tropheini          | KF049224      | KF049291       | KF049331       | KF049369       | KF049413       |
| <i>Tropheus moori</i>               | Tropheini          | KF049225      | KF049266       | KF049305       | KF049346       | KF049387       |
| <i>Tylochromis polylepis</i>        | Tylochromini       | KF049226      | KF049285       | KF049325       | KF049363       | KF049407       |

\* The *Hivep2a* sequence for *N. sexfasciatus* could not be submitted to GenBank, due to a lack of completeness

**Table S2** Ensemble accession numbers or genomic location of teleost *Hivep* sequences used for primer design, phylogenetic and/or Vista analyses

| Species                                      | Ensemble/GenBank accession numbers and preliminary genome information |                     |                     |                    |                     |
|----------------------------------------------|-----------------------------------------------------------------------|---------------------|---------------------|--------------------|---------------------|
|                                              | <i>Hivep1</i>                                                         | <i>Hivep2a</i>      | <i>Hivep2b</i>      | <i>Hivep3a</i>     | <i>Hivep3b</i>      |
| <i>Danio rerio</i>                           | ENSDARG00000079528                                                    | ENSDARG00000039987  | ENSDARG00000018773  | ENSDARG00000075928 | ENSDARG00000037154  |
| <i>Gadus morhua</i>                          |                                                                       |                     |                     | ENSGMOG00000005293 |                     |
| <i>Gasterosteus aculeatus</i>                |                                                                       | ENSGACG00000011974  | ENSGACG00000011743  |                    | ENSGACG00000007350  |
| <i>Tetraodon nigrovirdis</i>                 | ENSTNIG00000004491                                                    | ENSTNIG00000010718  | ENSTNIG00000019322  |                    | ENSTNIG00000009667  |
| <i>Takifugu rubripes</i>                     | scaffold_69:866682-876734:1                                           | ENSTRUG00000015889  | ENSTRUG00000007039  | ENSTRUG00000010896 | ENSTRUG00000013983  |
| <i>Oryzias latipes</i>                       | ENSORLGG00000009270                                                   | ENSORLGG00000018133 | ENSORLGG00000008843 |                    | ENSORLGG00000019868 |
| <i>Oreochromis niloticus</i>                 | ENSONIG00000013692                                                    | ENSONIG00000018691  | ENSONIG00000000567  |                    | ENSONIG00000006743  |
| <i>Astatotilapia burtoni</i> <sup>1</sup>    |                                                                       |                     | scaffold_477        | scaffold_91        |                     |
| <i>Neolamprologus brichardi</i> <sup>1</sup> |                                                                       |                     | scaffold_57         | scaffold_36        |                     |
| <i>Pundamilia nyererei</i> <sup>1</sup>      |                                                                       |                     | scaffold_69         | scaffold_147       |                     |

<sup>1</sup> v1 assembly of the preliminary whole genome sequences by the Cichlid Genome Consortium ([cichlid.umd.edu/CGCindex.html](http://cichlid.umd.edu/CGCindex.html))

**Table S3 Primer names and Sequences used for Sequencing (top) and Gene-expression assay (bottom)**

| Locus          | Forward primer | 5' - 3' Sequence       | Reverse Primer | 5' - 3' Sequence      |
|----------------|----------------|------------------------|----------------|-----------------------|
| <i>Hivep1</i>  | Hivep1_2F93    | CGAGAGAACATCCAAAACAAAC | Hivep1_C4R74   | ATCCCACATTCTCACAGA    |
|                | Hivep1_4F105   | AACACATCCGCACCCACTC    | Hivep1_5R31    | GCCTTGGATTTCATGTGCTT  |
|                | Hivep1_4F144   | GCGTCCACTGCAACTTCTC    | Hivep1_5R59    | CCCATCTCCAAGCATTTC    |
|                | Hivep1_5F7     | TGACCAAGCACATGAAATCC   | Hivep1_6R471   | GGCACATCAAAGTCAGGGTAG |
|                | Hivep1_6F159   | CAGCACATCTCTCCAAA      | Hivep1_7R131   | GGTCTCTGTTCTGGGGTTT   |
| <i>Hivep2a</i> | Hivep2a_1F73   | CCCAGCTCNTTTGGACAGTA   | Hivep2a_2R484  | AGGTTAGGAGGGGTGGAAGT  |
|                | Hivep2a_2F219  | GCCTGACTACCCTGAAGCAA   | Hivep2a_3R133  | TTTCAGGCAACTCCATAGGC  |
|                | Hivep2a_8F129  | CCGACCCTATGTCTGCAAGT   | Hivep2a_9R95   | GTCTGCCTCAGTGCCTCAA   |
| <i>Hivep2b</i> | Hivep2b_1F6    | AGCAGAAACCACAAAAACCT   | Hivep2b_1R500  | CTTGATAGGACTTTGCGTTTG |
|                | Hivep2b_2F42   | CGGGAAGAAGGTGAAAGACA   | Hivep2b_5R129  | CGTCTCATCGTCATCTTCA   |
| <i>Hivep3a</i> | Hivep3a_1F1    | CAGAAACGTGAGCGTAAG     | Hivep3a_1R936  | ATTTGARGGTGGGTGATGAA  |
|                | Hivep3a_1F856  | GTTGGCGATGTGGGCTAT     | Hivep3a_1R841  | TGATGTTTTGCTGTGGTGGT  |
|                | Hivep3a_1F1297 | TGCCTAKCACATCAACCCATC  | Hivep3a_1R2243 | CTTTCYCTCCACCAAYTGC   |
| <i>Hivep3b</i> | Hivep3b_1F8    | GAGAAGAAACCACAAAAC     | Hivep3b_1R123  | GGCTTCTCCTTTGGGATCA   |
|                | Hivep3b_1F132  | AGCCTGCCATAGAGGTTCC    | Hivep3b_4R50   | AATGTCTGACTTCGCTGAGG  |
|                | Hivep3b_F40    | CGGCAGGGGAAAGTACATA    | Hivep3b_R223   | CCTTGCTTAGAGTGCCTGCT  |

| Locus          | Forward sequence         | Reverse sequence           |
|----------------|--------------------------|----------------------------|
| <i>Hivep1</i>  | ATGCCCGCAGCAGGAA         | TCCATGTAGATGTCCAAGCTGTTT   |
| <i>Hivep2a</i> | TGCCATGTCCCAGTCACTTAA    | GAGCGTGAAAAGTAGCCAGAGTCT   |
| <i>Hivep2b</i> | CGAGGCTAGTCGTGCAATTCA    | AGAGTCACTGCTTCTTTTTTCAGACA |
| <i>Hivep3a</i> | GAGCAGCCAGCTAGCCAAAC     | ATAAACTGGCTTCAGGTGGCATT    |
| <i>Hivep3b</i> | CCAGACAGCCACAGCAACAA     | CCCCACATGTTCCACATTCA       |
| <i>EF1</i>     | GCCCTGCAGGACGTCTA*       | CGGCCGACGGGTACAGT*         |
| <i>RpSA3</i>   | AGACCAATGACCTGAAGGAAGTG* | TCTCGATGTCCTTGCCAACA*      |
| <i>AIF1</i>    | GGTTTGAAGAGGATGTTGGAGAA  | CAACCACCTCTGCCATCATTT      |
| <i>IL10</i>    | TGGCGCTCGCGTCTTT         | CGGCAGCAGCGTTGT            |
| <i>F2RL1</i>   | TGGGAATAAAGCACACAAGGAA   | CATCAAAGAACCACACAAAGTTG    |
| <i>TLR5</i>    | GCATGTTGCTGGTCTCAATTTG   | GAAGTGAGGCCCTTGAAAACAC     |

\* Primers from Colombo *et al.* 2013
