# Supplementary material for: Immune-Related Functions of the Hivep Gene Family in East African Cichlid Fishes
Source: PubMed Central journal article supplement (PMC3852383; doi:10.1534/g3.113.008839), 2013-10-18
Supplement: supp_g3.113.008839_FigureS2.pdf [file supp_g3.113.008839_FigureS2.pdf]

## Color key for radical amino acid properties per *Hivep* paralog in Figure 2

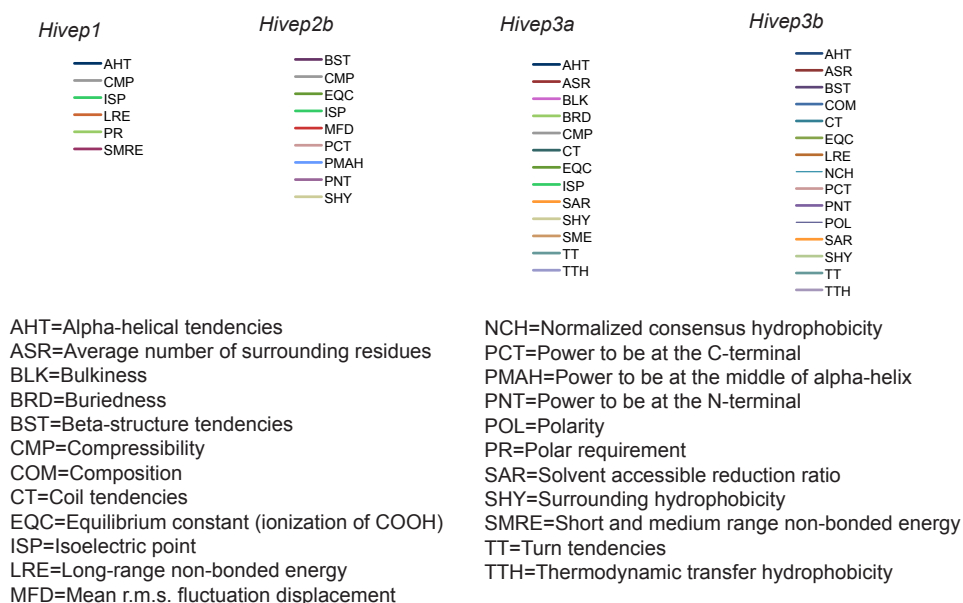

**Figure S2** Overview of the radical amino acid properties identified by the TreeSAAP analyses for four *Hivep* paralogs. Colors correspond to the sliding window plots in Fig. 2 and amino acid properties abbreviations are displayed for each paralog individually.
