# Supplementary material for: Immune-Related Functions of the Hivep Gene Family in East African Cichlid Fishes
Source: PubMed Central journal article supplement (PMC3852383; doi:10.1534/g3.113.008839), 2013-10-18
Supplement: supp_g3.113.008839_TableS1.pdf [file supp_g3.113.008839_TableS1.pdf]

**Table S1 Species names, Tribes and GenBank accession numbers of the five sequenced *Hivep* paralogs**

| Species                             | Tribe              | <i>Hivep1</i> | <i>Hivep2a</i> | <i>Hivep2b</i> | <i>Hivep3a</i> | <i>Hivep3b</i> |
|-------------------------------------|--------------------|---------------|----------------|----------------|----------------|----------------|
| <i>Bathybates graueri</i>           | Bathybatini        | KF049218      | KF049276       | KF049316       | KF049357       | KF049398       |
| <i>Benthochromis tricoti</i>        | Benthochromis      | KF049245      | KF049264       | KF049303       | KF049373       | KF049385       |
| <i>Boulengerochromis microlepis</i> | Boulengerochromini | KF049229      | KF049258       | KF049297       | KF049337       | KF049377       |
| <i>Ctenochromis benthicola</i>      | Cyphotilapiini     | KF049241      | KF049267       | KF049306       | KF049347       | KF049388       |
| <i>Cyphotilapia frontosa</i>        | Cyphotilapiini     | KF049237      | KF049293       | KF049333       | KF049371       | KF049415       |
| <i>Cyprichromis leptosoma</i>       | Cyprichromini      | KF049227      | KF049265       | KF049304       | KF049345       | KF049386       |
| <i>Aulocranus dewindtii</i>         | Ectodini           | KF049244      | KF049263       | KF049335       | KF049344       | KF049384       |
| <i>Callochromis macrops</i>         | Ectodini           | KF049228      | KF049268       | KF049307       | KF049348       | KF049389       |
| <i>Cyathopharynx furcifer</i>       | Ectodini           | KF049238      | KF049296       | KF049336       | KF049341       | KF049381       |
| <i>Grammatotria lemairii</i>        | Ectodini           | KF049249      | KF049272       | KF049311       | KF049352       | KF049393       |
| <i>Xenotilapia flavipinnis</i>      | Ectodini           | KF049256      | KF049288       | KF049328       | KF049366       | KF049410       |
| <i>Xenotilapia spiloptera</i>       | Ectodini           | KF049254      | KF049286       | KF049326       | KF049364       | KF049408       |
| <i>Eretmodus cyanostictus</i>       | Eretmodini         | KF049239      | KF049295       | KF049298       | KF049338       | KF049378       |
| <i>Astatotilapia burtoni</i>        | Haplochromini      | KF049240      | KF049260       | KF049300       | KF049340       | KF049380       |
| <i>Ctenochromis horei</i>           | Haplochromini      | KF049246      | KF049290       | KF049330       | KF049368       | KF049412       |
| <i>Altolamprologus fasciatus</i>    | Lamprologini       | KF049243      | KF049289       | KF049329       | KF049367       | KF049411       |
| <i>Julidochromis ornatus</i>        | Lamprologini       | KF049248      | KF049271       | KF049310       | KF049351       | KF049392       |
| <i>Lamprologus lemairii</i>         | Lamprologini       | KF049255      | KF049273       | KF049312       | KF049353       | KF049394       |
| <i>Lepidiolamprologus elongatus</i> | Lamprologini       | KF049242      | KF049294       | KF049334       | KF049372       | KF049416       |
| <i>Neolamprologus furcifer</i>      | Lamprologini       | KF049230      | KF049275       | KF049315       | KF049356       | KF049397       |
| <i>Neolamprologus pulcher</i>       | Lamprologini       | KF049231      | KF049274       | KF049314       | KF049355       | KF049396       |
| <i>Neolamprologus sexfasciatus</i>  | Lamprologini       | KF049250      | -*             | KF049313       | KF049354       | KF049395       |
| <i>Neolamprologus tetracanthus</i>  | Lamprologini       | KF049251      | KF049278       | KF049318       | KF049374       | KF049400       |
| <i>Telmatochromis dhonti</i>        | Lamprologini       | KF049257      | KF049284       | KF049324       | KF049375       | KF049406       |
| <i>Variabilichromis moorii</i>      | Lamprologini       | KF049219      | KF049292       | KF049332       | KF049370       | KF049414       |
| <i>Gnathochromis permaxillaris</i>  | Limnochromini      | KF049232      | KF049269       | KF049308       | KF049349       | KF049390       |
| <i>Limnochromis staneri</i>         | Limnochromini      | KF049220      | KF049262       | KF049302       | KF049343       | KF049383       |
| <i>Reganochromis calliurus</i>      | Limnochromini      | KF049252      | KF049282       | KF049322       | KF049376       | KF049404       |
| <i>Haplotaxodon microlepis</i>      | Perissodini        | KF049247      | KF049270       | KF049309       | KF049350       | KF049391       |
| <i>Perissodus microlepis</i>        | Perissodini        | KF049233      | KF049279       | KF049319       | KF049359       | KF049401       |
| <i>Plecodus straeleni</i>           | Perissodini        | KF049221      | KF049261       | KF049301       | KF049342       | KF049382       |
| <i>Oreochromis tanganyicae</i>      | Tilapiini          | KF049234      | KF049277       | KF049317       | KF049358       | KF049399       |
| <i>Trematocara nigrifrons</i>       | Trematocarini      | KF049235      | KF049280       | KF049320       | KF049360       | KF049402       |
| <i>Lobochilotes labiatus</i>        | Tropheini          | KF049222      | KF049287       | KF049327       | KF049365       | KF049409       |
| <i>Petrochromis famula</i>          | Tropheini          | KF049236      | KF049281       | KF049321       | KF049361       | KF049403       |
| <i>Petrochromis polyodon</i>        | Tropheini          | KF049253      | KF049283       | KF049323       | KF049362       | KF049405       |
| <i>Pseudosimochromis curvifrons</i> | Tropheini          | KF049223      | KF049259       | KF049299       | KF049339       | KF049379       |
| <i>Simochromis diagramma</i>        | Tropheini          | KF049224      | KF049291       | KF049331       | KF049369       | KF049413       |
| <i>Tropheus moori</i>               | Tropheini          | KF049225      | KF049266       | KF049305       | KF049346       | KF049387       |
| <i>Tylochromis polylepis</i>        | Tylochromini       | KF049226      | KF049285       | KF049325       | KF049363       | KF049407       |

\* The *Hivep2a* sequence for *N. sexfasciatus* could not be submitted to GenBank, due to a lack of completeness
