# Supplementary material for: Immune-Related Functions of the Hivep Gene Family in East African Cichlid Fishes
Source: PubMed Central journal article supplement (PMC3852383; doi:10.1534/g3.113.008839), 2013-10-18
Supplement: supp_g3.113.008839_TableS2.pdf [file supp_g3.113.008839_TableS2.pdf]

**Table S2** Ensemble accession numbers or genomic location of teleost *Hivep* sequences used for primer design, phylogenetic and/or Vista analyses

| Species                                      | Ensemble/GenBank accession numbers and preliminary genome information |                     |                     |                    |                     |
|----------------------------------------------|-----------------------------------------------------------------------|---------------------|---------------------|--------------------|---------------------|
|                                              | <i>Hivep1</i>                                                         | <i>Hivep2a</i>      | <i>Hivep2b</i>      | <i>Hivep3a</i>     | <i>Hivep3b</i>      |
| <i>Danio rerio</i>                           | ENSDARG00000079528                                                    | ENSDARG00000039987  | ENSDARG00000018773  | ENSDARG00000075928 | ENSDARG00000037154  |
| <i>Gadus morhua</i>                          |                                                                       |                     |                     | ENSGMOG00000005293 |                     |
| <i>Gasterosteus aculeatus</i>                |                                                                       | ENSGACG00000011974  | ENSGACG00000011743  |                    | ENSGACG00000007350  |
| <i>Tetraodon nigrovirdis</i>                 | ENSTNIG00000004491                                                    | ENSTNIG00000010718  | ENSTNIG00000019322  |                    | ENSTNIG00000009667  |
| <i>Takifugu rubripes</i>                     | scaffold_69:866682-876734:1                                           | ENSTRUG00000015889  | ENSTRUG00000007039  | ENSTRUG00000010896 | ENSTRUG00000013983  |
| <i>Oryzias latipes</i>                       | ENSORLGG00000009270                                                   | ENSORLGG00000018133 | ENSORLGG00000008843 |                    | ENSORLGG00000019868 |
| <i>Oreochromis niloticus</i>                 | ENSONIG00000013692                                                    | ENSONIG00000018691  | ENSONIG00000000567  |                    | ENSONIG00000006743  |
| <i>Astatotilapia burtoni</i> <sup>1</sup>    |                                                                       |                     | scaffold_477        | scaffold_91        |                     |
| <i>Neolamprologus brichardi</i> <sup>1</sup> |                                                                       |                     | scaffold_57         | scaffold_36        |                     |
| <i>Pundamilia nyererei</i> <sup>1</sup>      |                                                                       |                     | scaffold_69         | scaffold_147       |                     |

<sup>1</sup> v1 assembly of the preliminary whole genome sequences by the Cichlid Genome Consortium ([cichlid.umd.edu/CGCindex.html](http://cichlid.umd.edu/CGCindex.html))
