# Supplementary material for: Immune-Related Functions of the Hivep Gene Family in East African Cichlid Fishes
Source: PubMed Central journal article supplement (PMC3852383; doi:10.1534/g3.113.008839), 2013-10-18
Supplement: supp_g3.113.008839_TableS3.pdf [file supp_g3.113.008839_TableS3.pdf]

**Table S3 Primer names and Sequences used for Sequencing (top) and Gene-expression assay (bottom)**

| Locus          | Forward primer | 5' - 3' Sequence       | Reverse Primer | 5' - 3' Sequence      |
|----------------|----------------|------------------------|----------------|-----------------------|
| <i>Hivep1</i>  | Hivep1_2F93    | CGAGAGAACATCCAAAACAAAC | Hivep1_C4R74   | ATCCCACATTCTCACAGA    |
|                | Hivep1_4F105   | AACACATCCGCACCCACTC    | Hivep1_5R31    | GCCTTGGATTTCATGTGCTT  |
|                | Hivep1_4F144   | GCGTCCACTGCAACTTCTC    | Hivep1_5R59    | CCCATCTCCAAGCATTTC    |
|                | Hivep1_5F7     | TGACCAAGCACATGAAATCC   | Hivep1_6R471   | GGCACATCAAAGTCAGGGTAG |
|                | Hivep1_6F159   | CAGCACATCTCTCCAAA      | Hivep1_7R131   | GGTCTCTGTTCTGGGGTTT   |
| <i>Hivep2a</i> | Hivep2a_1F73   | CCCAGCTCNTTTGGACAGTA   | Hivep2a_2R484  | AGGTTAGGAGGGGTGGAAGT  |
|                | Hivep2a_2F219  | GCCTGACTACCCTGAAGCAA   | Hivep2a_3R133  | TTTCAGGCAACTCCATAGGC  |
|                | Hivep2a_8F129  | CCGACCCTATGTCTGCAAGT   | Hivep2a_9R95   | GTCTGCCTCAGTGCCTCAA   |
| <i>Hivep2b</i> | Hivep2b_1F6    | AGCAGAAACCACAAAAACCT   | Hivep2b_1R500  | CTTGATAGGACTTTGCGTTTG |
|                | Hivep2b_2F42   | CGGGAAGAAGGTGAAAGACA   | Hivep2b_5R129  | CGTCTCATCGTCATCTTCA   |
| <i>Hivep3a</i> | Hivep3a_1F1    | CAGAAACGTGAGCGTAAG     | Hivep3a_1R936  | ATTTGARGGTGGGTGATGAA  |
|                | Hivep3a_1F856  | GTTGGCGATGTGGGCTAT     | Hivep3a_1R841  | TGATGTTTTGCTGTGGTGGT  |
|                | Hivep3a_1F1297 | TGCCTAKCACATCAACCCATC  | Hivep3a_1R2243 | CTTTCYCTCCACCAAAYTGC  |
| <i>Hivep3b</i> | Hivep3b_1F8    | GAGAAGAAACCACAAAAAC    | Hivep3b_1R123  | GGCTTCTCCTTTGGGATCA   |
|                | Hivep3b_1F132  | AGCCTGCCATAGAGGTTCC    | Hivep3b_4R50   | AATGTCTGACTTCGCTGAGG  |
|                | Hivep3b_F40    | CGGCAGGGGAAAGTACATA    | Hivep3b_R223   | CCTTGCTTAGAGTGCCTGCT  |

| Locus          | Forward sequence         | Reverse sequence           |
|----------------|--------------------------|----------------------------|
| <i>Hivep1</i>  | ATGCCCGCAGCAGGAA         | TCCATGTAGATGTCCAAGCTGTTT   |
| <i>Hivep2a</i> | TGCCATGTCCCAGTCACTTAA    | GAGCGTGAAAAGTAGCCAGAGTCT   |
| <i>Hivep2b</i> | CGAGGCTAGTCGTGCAATTCA    | AGAGTCACTGCTTCTTTTTTCAGACA |
| <i>Hivep3a</i> | GAGCAGCCAGCTAGCCAAAC     | ATAAACTGGCTTCAGGTGGCATT    |
| <i>Hivep3b</i> | CCAGACAGCCACAGCAACAA     | CCCCACATGTTCCACATTCA       |
| <i>EF1</i>     | GCCCTGCAGGACGTCTA*       | CGGCCGACGGGTACAGT*         |
| <i>RpSA3</i>   | AGACCAATGACCTGAAGGAAGTG* | TCTCGATGTCCTTGCCAACA*      |
| <i>AIF1</i>    | GGTTTGAAGAGGATGTTGGAGAA  | CAACCACCTCTGCCATCATTT      |
| <i>IL10</i>    | TGGCGCTCGCGTCTTT         | CGGCAGCAGCGTTGT            |
| <i>F2RL1</i>   | TGGGAATAAAGCACACAAGGAA   | CATCAAAGAACCACACAAAGTTG    |
| <i>TLR5</i>    | GCATGTTGCTGGTCTCAATTTG   | GAAGTGAGGCCCTTGAAAACAC     |

\* Primers from Colombo *et al.* 2013
